# Supplementary material for: Improving Generalizability of PET DL Algorithms: List-Mode Reconstructions Improve DOTATATE PET Hepatic Lesion Detection Performance
Source: MDPI journal article supplement (doi:10.3390/bioengineering11030226), 2024-02-27
Supplement: s1 [file s1]

## Article

# Improving Generalizability of PET DL Algorithms: List-Mode Reconstructions Improve DOTATATE PET Hepatic Lesion Detection Performance

Xinyi Yang <sup>1</sup>, Michael Silosky <sup>2</sup>, Jonathan Wehrend <sup>3</sup>, Daniel V. Litwiller <sup>4</sup>, Muthiah Nachiappan <sup>2</sup>, Scott D. Metzler <sup>5</sup>, Debashis Ghosh <sup>1</sup>, Fuyong Xing <sup>1,6,7</sup> and Bennett B. Chin <sup>2,7,\*</sup>

<sup>1</sup> Department of Biostatistics and Informatics, University of Colorado Anschutz Medical Campus, Aurora, CO, USA; xinyi.2.yang@cuanschutz.edu (X.Y.); debashis.ghosh@cuanschutz.edu (D.G.); fuyong.xing@cuanschutz.edu (F.X.)

<sup>2</sup> Department of Radiology, University of Colorado Anschutz Medical Campus, Aurora, CO, USA; michael.silosky@cuanschutz.edu (M.S.); muthiah.nachiappan@cuanschutz.edu (M.N.)

<sup>3</sup> Department of Radiology, Santa Clara Valley Medical Center, San Jose, CA, USA; jwehrend@gmail.com

<sup>4</sup> GE HealthCare, Denver, CO, USA; daniel.litwiller@ge.com

<sup>5</sup> Department of Radiology, University of Pennsylvania, Philadelphia, PA, USA; scott.metzler@uphs.upenn.edu

<sup>6</sup> The Computational Bioscience Program, University of Colorado Anschutz Medical Campus, Aurora, CO, USA

<sup>7</sup> University of Colorado Cancer Center, University of Colorado Anschutz Medical Campus, Aurora, CO, USA; Fuyong.xing@cuanschutz.edu, bennett.chin@cuanschutz.edu

\* Correspondence: bennett.chin@cuanschutz.edu

## Supplementary Materials:

A U-Net-like architecture [12] was used for the lesion detection (Figure S1). The neural network has performed well on lesion detection in PET datasets. The down-sampling path contains four residual learning blocks [19]. In the up-sampling path, there are four residual learning blocks and two transposed convolutional layers [20] to aggregate contextual information [21].

The model was optimized with a Combo loss, which is a linear combination of binary cross-entropy loss and Dice loss [22].

$$\mathcal{L}_{COMBO}(y_n, \hat{y}_n) = \alpha \mathcal{L}_{BCE}(y_n, \hat{y}_n) + \mathcal{L}_{DICE}(y_n, \hat{y}_n)$$

$$\mathcal{L}_{BCE}(y_n, \hat{y}_n) = \mathbb{E}_{(x,y) \sim (X,Y)} \left[ -\frac{1}{N} \sum_{n=1}^N (\omega y_n \log(\hat{y}_n + \varepsilon) + (1 - y_n) \log(1 - \hat{y}_n + \varepsilon)) \right]$$

$$\mathcal{L}_{DICE}(y_n, \hat{y}_n) = \mathbb{E}_{(x,y) \sim (X,Y)} \left[ 1 - \frac{\sum_{n=1}^N y_n \hat{y}_n + \delta}{\sum_{n=1}^N y_n + \hat{y}_n + \delta} - \frac{\sum_{n=1}^N b_n \hat{b}_n + \delta}{\sum_{n=1}^N b_n + \hat{b}_n + \delta} \right]$$

where  $y_n \in y$  is the  $i^{\text{th}}$  value of the gold-standard label  $y$  and  $\hat{y}_n \in \hat{y}$  is the  $i^{\text{th}}$  value of the corresponding prediction  $\hat{y}$ .

## Implementation Details

We empirically set  $\alpha = 6$ ,  $\omega = 5$ ,  $\delta = 1$ . We optimize the lesion detection network using stochastic gradient descent with Nesterov momentum: learning rate = 0.0005, momentum = 0.99, batch size = 8, and total iterations =  $10^5$ .

Additionally, a data augmentation module was used to help train the model. The module consists of random shifting, random flipping, and random rotation.

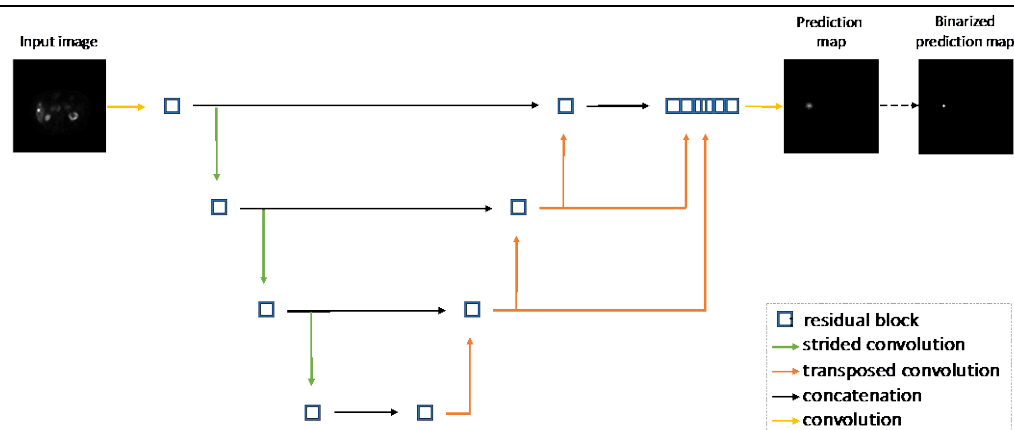

**Figure S1.** Model Training for Lesion Detection—Network architecture.
